# Supplementary material
Source: MDPI journal article supplement (https://www.mdpi.com/2073-4441/16/6/898)
Supplement: s1 [file s1]

Archive with 2 entries (2 files):
- WATER SUPPLEMENTARY MATERIALS - 2.xlsx
- water-2824787-supplementary.pdf
