# Supplementary material
Source: MDPI journal article supplement (https://www.mdpi.com/2073-4441/16/6/898)
Supplement: s1 [file s1 › WATER SUPPLEMENTARY MATERIALS - 2.xlsx]

## Sheet: Table S1
REFERENCES – BENEFITS IDENTIFICATION
Code	DOI	Reference	Where	Year
21	https://doi.org/10.2134/jeq2010.0544	[19]	UK	2012
19	https://doi.org/10.1007/BF02400858	[20]	AUSTRALIA	1994
24	https://doi.org/10.1016/j.eja.2009.05.003	[21]	ITALY	2010
3	http://dx.doi.org/10.1016/j.ecoleng.2012.12.104	[22]	WORLD	2013
6	http://doi.org/10.1371/journal.pbio.1001247	[23]	NEW ZELAND	2013
20	http://dx.doi.org/10.1016/j.agee.2015.06.012	[24]	UK	2015
16	https://doi.org/10.1093/jof/100.1.35	[25]	US	2002
18		[26]	NORTH AMERICA	2000
13	http://dx.doi.org/10.2139/ssrn.1273002	[27]	WORLD	2008
2	https://doi.org/10.1029/2010WR009071	[28]	WORLD	2010
10	https://doi.org/10.1186/s13750-016-0067-6	[29]		2018
14	http://10.1007/s11273-015-9414-6	[30]	QUEBEC	2015
22	https://doi.org/10.2166/wqrj.2004.042	[31]	North America	2004
11	https://doi.org/10.1890/08-2064.1	[32]	WORLD	2010
4	https://doi.org/10.1016/j.ecolecon.2019.106460	[33]	EU	2020
17	http://dx.doi.org/10.1016/j.ecolecon.2014.12.004	[34]	UK	2015
12	https://doi.org/10.1371/journal.pone.0093507	[35]	WORLD	2014
7	http://dx.doi.org/10.1080/21513732.2015.1006250	[36]	Mexico, Brazil, US, EU	2015
5	http://doi.org/10.1007/s10980-012-9758-8	[37]	NORTH AMERICA, SOUTH AMERICA, BOTSWANA	2013
23	https://doi.org/10.1007/BF00872284	[38]	AUSTRALIA	1993
1	https://doi.org/10.2134/jeq2011.0439	[39]	EU	2012
8	https://doi.org/10.1016/j.jenvman.2019.03.078	[40]	Denmark	2019
15	https://doi.org/10.1016/S0921-8009(00)00276-7	[41]	WORLD	2001
9	https://doi.org/10.1016/j.scitotenv.2018.07.124	[42]	WORLD	2018
FREQUENCY – BENEFITS IDENTIFICATION
	Benefits	Wetlands (Frequency of references)	Buffer Strips (Frequency of references)
	FLOOD REGULATION	2, 3, 13, 14,15,	17, 18, 24
	WATER QUALITY IMPROVEMENT (Nitrogen load...)	2, 3, 7, 12, 13, 14, 15	4, 8, 16 17, 18, 19, 22
	WATER SUPPLY	2, 3, 4, 6, 12, 13, 15	1, 4, 10
	NATURAL HABITAT AND BIODIVERSITY SUPPORT	2, 6, 7, 12, 13, 14, 15	1, 10, 11, 18, 19, 22
	STORM BUFFERING	2, 13, 15
	COMMERCIAL FISHING AND HUNTING	2, 13, 14
	RECREATIONAL FISHING AND HUNTING	2, 13
	HARVESTING OF NATURAL MATERIALS	2, 4, 6, 12, 13, 15	1, 8, 18, 24
	FUEL WOOD	2, 8, 13
	RECREATION AND TOURISM	2, 6, 12, 13
	AMENITY AND AESTETHICS	2, 4, 6, 13, 15	8, 18, 24
	CARBON SEQUESTRATION	5, 7	1, 24
	PROVISION FOOD	4, 6, 12
	PROVISION GENETIC RESOURCES	4	4
	CLIMATE REGULATION	4, 6, 12	4
	DISEASE REGULATION	4, 12
	EROSION REGULATION	4, 6, 12	4, 9, 10, 18, 24
	POLLINATION		4, 20
	CULTURAL HERITAGE, SENSE OF PLACE	4, 6, 12	1, 4
	PROVISION ENERGY	4	8
	PRIMARY PRODUCTION	4, 12
	EXTREME EVENT MODERATION	6, 12
	WASTE TREATMENT	6
	SOIL FERTILITY	6, 12
	BIOLOGICAL CONTROL	6
	WATER FLOW REGULATION	7	1, 22
	CONTROL of NUTRIENTS AND CONTAMINANTS	15	1, 10, 16, 18, 19, 20, 22, 23, 24
	SEDIMENT RETENTION	13, 14, 15	18, 19, 22

## Sheet: Table S2
NBS (Wetland/Buffer strips)	Benefit	Original Reference (REFERENCES – COLLECTION OF VALUES)	Access to study	Year of value calculation	Where (socio-economic context)	Study site context/characteristics	Fitness to policy site (1 min - 5 max)	Relevance (indicator/ES)	Monetary valuation technique	Units	Economic value (latest availbale)		Year of lastest available update of the value	Reference (value taken from)
Wet	W_SUPPLY	[59]	YES	2006	Spain	Wetland in peri-urban park of Can Cabanyes; Single cell wetland of 1 ha; high human impact; designed to reduce ammonium and faecal coliforms	3	The private price of water is calculated considering all costs and benefits of the investment, operation and maintenance through conventional optimization process	Direct market pricing	€/ha/yr	19719	49275	2006
Wet	RECREATION	[59]	YES	2007	Spain	Wetland in peri-urban park of Can Cabanyes; Single cell wetland of 1 ha; high human impact; designed to reduce ammonium and faecal coliforms	3	Travel costs calculated as: Opportunity costs, which are based on the fact that a person who devotes time for leisure activities is paying for it, because he/she will not receive any wages during this time. Salaries are usually accepted as a proxy variable that reflects the opportunity costs of taking part in this recreational activity and therefore have been used in this study. (minimum interpro…	Travel Cost	€/person/visit	3		2007
Wet	AESTETHICS	[60]	X	1988	US	Inland wetalnd; Swamps / marshes; Great Lakes Coastal Wetlands, USA; Low density	3	ES. TEEB. Aesthetic appreciation and inspiration for culture, art and design: Language, knowledge and the natural environment have been intimately related throughout human history. Biodiversity, ecosystems and natural landscapes have been the source of inspiration for much of our art, culture and increasingly for science.	Hedonic Pricing	USD/ha/yr	83		1988	[43]
Wet	BIODIVERSITY	[61]	YES	2004	Canada	Canada’s boreal non-peatland wetlands (or mineral wetlands)	2	ES. TEEB Maintenance of genetic diversity: Genetic diversity is the variety of genes between and within species populations. Genetic diversity distinguishes different breeds or races from each other thus providing the basis for locally well-adapted cultivars and a gene pool for further developing commercial crops and livestock. Some habitats have an exceptionally high number of species which make…	Value transfer	CAD/ha/yr	263		2002
Wet	CARBON_SEQ	[61]	YES	2004	Canada	Canada’s boreal peatland	2	ES. TEEB Carbon sequestration and storage: Ecosystems regulate the global climate by storing and sequestering greenhouse gases. As trees and plants grow, they remove carbon dioxide from the atmosphere and effectively lock it away in their tissues. In this way forest ecosystems are carbon stores. Biodiversity also plays an important role by improving the capacity of ecosystems to adapt to the effe…	Cost-based	CAD/ha/yr	5		2002
Wet	FLOOD	[61]	YES	2004	Canada	Canada’s boreal non-peatland wetlands (or mineral wetlands)	2	ES. TEEB Moderation of extreme events (flood protection): Extreme weather events or natural hazards include floods, storms, tsunamis, avalanches and landslides. Ecosystems and living organisms create buffers against natural disasters, thereby preventing possible damage. For example, wetlands can soak up flood water whilst trees can stabilize slopes. Coral reefs and mangroves help protect coastlin…	Value transfer	CAD/ha/yr	571		2001
Wet	FLOOD	[61]	YES	2004	Canada	Canada’s boreal peatland	2	ES. TEEB Moderation of extreme events (flood protection): Extreme weather events or natural hazards include floods, storms, tsunamis, avalanches and landslides. Ecosystems and living organisms create buffers against natural disasters, thereby preventing possible damage. For example, wetlands can soak up flood water whilst trees can stabilize slopes. Coral reefs and mangroves help protect coastlin…	Value transfer	CAD/ha/yr	926		2001
Wet	W_QUALITY	[61]	YES	2004	Canada	Canada’s boreal non-peatland wetlands (or mineral wetlands)	2	ES. TEEB Waste-water treatment (Sinks of nutrients and contaminants) : Ecosystems such as wetlands filter both human and animal waste and act as a natural buffer to the surrounding environment. Through the biological activity of microorganisms in the soil, most waste is broken down. Thereby pathogens (disease causing microbes) are eliminated, and the level of nutrients and pollution is reduced.	Value Transfer	CAD/ha/yr	354		2002
Wet	BIODIVERSITY	[62]	YES	2005	Greece	Wetland of 168 km2 area; includes Lake Cheimaditida; surrounded by extensive marshes with reed; rich in flora, fauna and habitat diversity. Main economic activities: agriculture, forestry and fishing. Water extraction from the lake for irrigation, and pollution due to run-off from agricultural production	4	Marginal WTP for an increase in wetland management attribute: number of different species of plants, animals, their population levels, the number of different habitats and their size.	Choice Experiment	€/respondent/one-off payment	13	17	2003
Wet	EDUCATION	[62]	YES	2005	Greece	Wetland of 168 km2 area; includes Lake Cheimaditida; surrounded by extensive marshes with reed; rich in flora, fauna and habitat diversity. Main economic activities: agriculture, forestry and fishing. Water extraction from the lake for irrigation, and pollution due to run-off from agricultural production	4	Marginal WTP for an improvement in wetland management attribute: educational, research and cultural information that may be derived from the existence of the wetland, including visits by scientists, students, and school children to learn about ecology and nature	Choice Experiment	€/respondent/one-off payment	9	13	2003
Wet	W_SUPPLY	[63]	YES	2007	Spain	The Catalan coast comprises a 22.8 % of the total terrestrial surface in Catalonia and 21.5 % of its continental shelf. The study area comprises a total of 922,892 ha, where 731,408 ha correspond to the terrestrial domain and 191,484 ha to the marine domain. The coastal and marine domain includes the true marine continental shelf and seagrass beds, and the oceanic influenced beaches, dunes and sa…	5	ES. Water supply: Filtering, retention & storage of fresh water (e.g. aquifers) -> Provision of water for consumptive use (e.g. drinking, irrigation, industrial)	Value transfer	USD/ha/yr	3815		2004
Wet	BIODIVERSITY	[63]	YES	2007	Spain	Values reported: Terrestrial Domain, Land Cover: Freshwater wetland. The study area comprises a total of 922,892 ha, where 77.8 % are terrestrial: includes the vegetated communities, freshwater flows and bodies, and the more artificial and urban related land covers.	5	ES. Suitable living space for wild species -> Maintenance of biological & genetic diversity; thus the basis of most other functions (e.g. community structure of sea grass meadows) AND Suitable reproduction/grow habitat -> Maintenance of wild/commercially harvested species (e.g. sea grass meadows, coraligen & littoral rock for fish juveniles)	Value transfer	USD/ha/yr	279		2004
Wet	W_QUALITY	[63]	YES	2007	Spain	Values reported: Terrestrial Domain, Land Cover: Freshwater wetland. The study area comprises a total of 922,892 ha, where 77.8 % are terrestrial: includes the vegetated communities, freshwater flows and bodies, and the more artificial and urban related land covers.	5	ES. Role of vegetation & biota in removal of xenic compounds -> Pollution control, detoxification, decomposition, filtering of particles by bacteria and other organisms; removal of nutrients such as nitrogen and phosphorous; beneficial trophic dynamics; abatement of noise pollution	Value transfer	USD/ha/yr	2071		2004
Wet	FLOOD	[63]	YES	2007	Spain	Values reported: Terrestrial Domain, Land Cover: Freshwater wetland. The study area comprises a total of 922,892 ha, where 77.8 % are terrestrial: includes the vegetated communities, freshwater flows and bodies, and the more artificial and urban related land covers.	5	ES. Role of land cover in regulating runoff & river discharge -> Drainage and natural irrigation	Value transfer	USD/ha/yr	7378		2004
Wet	FLOOD	[63]	YES	2007	Spain	Values reported: Terrestrial Domain, Land Cover: Freshwater wetland. The study area comprises a total of 922,892 ha, where 77.8 % are terrestrial: includes the vegetated communities, freshwater flows and bodies, and the more artificial and urban related land covers.	5	ES. Influence of ecosystem structure on dampening environmental disturbances -> Storm protection (e.g. natural beaches, dunes, small bays or calas); flood protection (e.g. wetlands, forest, rieras)	Value transfer	USD/ha/yr	9037		2004
Wet	RECREATION	[63]	YES	2004	Spain	Values reported: Terrestrial Domain, Land Cover: Freshwater wetland. The study area comprises a total of 922,892 ha, where 77.8 % are terrestrial: includes the vegetated communities, freshwater flows and bodies, and the more artificial and urban related land covers.	5	ES. Attractive land/seascape features -> Enjoyment of scenery (e.g. scenic roads, housing, coastal/seascape) AND Land/seascapes with recreational uses -> Travel to natural ecosystems for eco-tourism, rural-tourism & nature study/enjoy; coast related cultural & sports events	Value transfer	USD/ha/yr	3474		2004
Wet	AESTETHICS	[63]	YES	2007	Spain	Values reported: Terrestrial Domain, Land Cover: Freshwater wetland. The study area comprises a total of 922,892 ha, where 77.8 % are terrestrial: includes the vegetated communities, freshwater flows and bodies, and the more artificial and urban related land covers.	5	ES. Natural features with cultural & artistic value -> Use of nature as motive in books, films, painting, folklore, architecture, marketing AND Natural features with spiritual & historic value -> Use of nature for religious or historic purposes (e.g. heritage value of natural ecosystems & features, small fisherman ermitas)	Value transfer	USD/ha/yr	2199		2004
BS	W_SUPPLY	[63]	YES	2007	Spain	Values reported: Terrestrial Domain, Land Cover: Riparian Buffer. The study area comprises a total of 922,892 ha, where 77.8 % are terrestrial: includes the vegetated communities, freshwater flows and bodies, and the more artificial and urban related land covers.	5	ES. Water supply: Filtering, retention & storage of fresh water (e.g. aquifers) -> Provision of water for consumptive use (e.g. drinking, irrigation, industrial)	Value transfer	USD/ha/yr	4747		2004
BS	FLOOD	[63]	YES	2007	Spain	Values reported: Terrestrial Domain, Land Cover: Riparian Buffer. The study area comprises a total of 922,892 ha, where 77.8 % are terrestrial: includes the vegetated communities, freshwater flows and bodies, and the more artificial and urban related land covers.	5	ES. Influence of ecosystem structure on dampening environmental disturbances -> Storm protection (e.g. natural beaches, dunes, small bays or calas); flood protection (e.g. wetlands, forest, rieras)	Value transfer	USD/ha/yr	217		2004
BS	RECREATION	[63]	YES	2007	Spain	Values reported: Terrestrial Domain, Land Cover: Riparian Buffer. The study area comprises a total of 922,892 ha, where 77.8 % are terrestrial: includes the vegetated communities, freshwater flows and bodies, and the more artificial and urban related land covers.	5	ES. Attractive land/seascape features -> Enjoyment of scenery (e.g. scenic roads, housing, coastal/seascape) AND Land/seascapes with recreational uses -> Travel to natural ecosystems for eco-tourism, rural-tourism & nature study/enjoy; coast related cultural & sports events	Value transfer	USD/ha/yr	3385		2004
Wet	W_QUALITY	[64]	YES	2006	Spain	Guadalquivir River basin (GRB) with different land covers (wetlands is 1.8%). Water flows used for human consumption, agriculture (80%); main sources of pollution: urban and industrial wastewater discharge, erosion, and nutrient and pesticide runoff from agricultural land.	5	WTP for water quality improvement with respect to the baseline situation, up to a ‘‘very good’’ level. That is, water quality in each subbasin is equal to or better than the baseline situation in each subbasin.	Choice experiment	EUR/household/year	123	212	2006
BS	AESTETHICS	[65]	YES	2016	EU, US, Australia	na	3	ES. Mean WTP FOR landscape aesthetics of natural or restored river corridor	Value Transfer	USD/household/yr	18	238	2015
Wet	EDUCATION	[66]	X	1983	Canada	Petawawa National Forestry Institute's (Ontario, Canada)	2	Environmental education: estimate of tc visit to a national forest interpretive facility	Travel cost	USD/person/visit	6	17	1983	[80]
BS	EDUCATION	[66]	X	1983	Canada	Petawawa National Forestry Institute's (Ontario, Canada)	2	Environmental education: estimate of tc visit to a national forest interpretive facility	Travel cost	USD/person/visit	6	17	2017	[80]
Wet	FLOOD	[67]	YES	1996	US	na	3	ES. TEEB Moderation of extreme events (flood protection): Extreme weather events or natural hazards include floods, storms, tsunamis, avalanches and landslides. Ecosystems and living organisms create buffers against natural disasters, thereby preventing possible damage. For example, wetlands can soak up flood water whilst trees can stabilize slopes. Coral reefs and mangroves help protect coastlin…	Cost-based	USD/ha/yr	4436		2007	[44]
Wet	RECREATION	[68]	YES	1991	US	San Joaquin Valley, including the National Wildlife Refuges, the State Wildlife Management Areas, and six river destinations.	4	Recreational benefit (wildlife viewing): increased number of visitors selecting a particular wetland and increased trip frequency in response to increased water supply to wetlands.	Travel cost type	USD/respondent/yr	128	173	1989
Wet	W_QUALITY	[69]	X	2000	Germany	Floodplains; River Elbe	5	ES. Sinks of nutrients and contaminants (pollution control)	Cost-based	GBP/ha/yr	386	1146	2000	[70]
Wet	BIODIVERSITY	[71]	YES	2011	Canada	Northern Great Plains of North America, Saskatchewan province; annual crops, and intensive and extensive livestock production; degradation of prairie wetlands on privately owned lands;	3	Marginal WTP for an increase in the level of habitat and wildlife population	Choice experiment	CAD/household/one-off payment	58		2011
Wet	W_QUALITY	[71]	YES	2011	Canada	Northern Great Plains of North America, Saskatchewan province; annual crops, and intensive and extensive livestock production; degradation of prairie wetlands on privately owned lands;	3	Marginal WTP for a decrease in boil water advisories	Choice experiment	CAD/household/one-off payment	105		2011
BS	W_QUALITY	[71]	YES	2011	Canada	Northern Great Plains of North America, Saskatchewan province; annual crops, and intensive and extensive livestock production; degradation of prairie wetlands on privately owned lands;	3	Marginal WTP for an increase in the buffering of sediment, nutrients, pesticides and wildlife habitat benefits. RISK OF DOUBLE COUNTING	Choice experiment	CAD/household/one-off payment	65		2011
Wet	BIODIVERSITY	[72]	YES	2000	Denmark	Skjern River project, 2,200 hectares (ha); retention of nutrients and ochre in the wetlands (wet meadowlands) of the river valley.	4	Adjusted value transfer of non-users’ willingness to pay for the project outcome (existence value: to ensure/re-establish the biodiversity of wet meadowlands; improve the habitats for a number of rare and endangered species)	Value transfer	DKK/ha/yr	1207		2000
Wet	FLOOD	[72]	YES	2000	Denmark	Skjern River project, 2,200 hectares (ha); retention of nutrients and ochre in the wetlands (wet meadowlands) of the river valley.	4	Based on estimates of reduced flood risk for 30 houses affected outside project area, and information from the National Floods Council on compensation expenses.	Cost-based	DKK/house/yr	1000		2000
Wet	RECREATION	[72]	YES	2000	Denmark	Skjern River project, 2,200 hectares (ha); retention of nutrients and ochre in the wetlands (wet meadowlands) of the river valley.	4	Recreational value: adjusted value transfer of willingness to pay for access	Value transfer	DKK/person/visit	40		2000
Wet	W_QUALITY	[72]	YES	2000	Denmark	Skjern River project, 2,200 hectares (ha); retention of nutrients and ochre in the wetlands (wet meadowlands) of the river valley.	4	Annual retention and reduction of phosphorus in the project area x the average costs of removing phosphorus at water treatment plants evaluated by COWI	Direct market pricing	DKK/ha/yr	480		2000
Wet	W_QUALITY	[72]	YES	2000	Denmark	Skjern River project, 2,200 hectares (ha); retention of nutrients and ochre in the wetlands (wet meadowlands) of the river valley.	4	Annual reduction of nitrogen pollution x unit cost price of nitrogen reduction through the establishment of wet meadows	Direct market pricing	DKK/ha/yr	1750		2000
BS	AESTETHICS	[73]	YES	2009	UK	Bristol Avon flows through towns; high bank and erosive edge impacted by cattle poaching; creation of a buffer zone fencing off 330 metres of the field edge whithin a farm; visually attractive through split timber	4	Local amenity and informal enjoyment: attractive river walk alternative of the upper Bristol Avon in its poached state (Assuming that 1 person per week might otherwise drive 10 miles -40p per mile- for an alternative)	Value transfer	USD/ha/yr	1803		2007	[44]
BS	BIODIVERSITY	[73]	YES	2009	UK	Bristol Avon flows through towns; high bank and erosive edge impacted by cattle poaching; creation of a buffer zone fencing off 330 metres of the field edge whithin a farm; visually attractive through split timber	4	Provision of habitat: active management (1 man/digger days + haulage costs on a fiveyearly cycle) to clean habitat or undertake bespoke projects) and equivalent addition of volunteer input for contribution of the buffer zone to river management for WFD purposes	Cost-based	USD/ha/yr	14		2007	[43]
BS	CARBON_SEQ	[73]	YES	2009	UK	Bristol Avon flows through towns; high bank and erosive edge impacted by cattle poaching; creation of a buffer zone fencing off 330 metres of the field edge whithin a farm; visually attractive through split timber	4	Climate regulation (local temperature/precipitation, GHG sequestration, etc.): transition from values in the literature for permanent grassland towards those derived for wetted, carbon accreting soils or to wet woodland, using a marginal cost of carbon of £27 per tonne	Value transfer	USD/ha/yr	2216		2007	[43]
BS	RECREATION	[73]	YES	2009	UK	Bristol Avon flows through towns; high bank and erosive edge impacted by cattle poaching; creation of a buffer zone fencing off 330 metres of the field edge whithin a farm; visually attractive through split timber	4	Angling benefits: assessed as a 2% uplift in angling to the Somerfords Fishing Association, assuming 160 paying members (£230) per annum and 20 honorary members deriving equivalent value	Direct market pricing	USD/ha/yr	7176		2007	[43]
BS	RECREATION	[73]	YES	2009	UK	Bristol Avon flows through towns; high bank and erosive edge impacted by cattle poaching; creation of a buffer zone fencing off 330 metres of the field edge whithin a farm; visually attractive through split timber	4	Wildlife-related recreation and ecotourism calculated on the assumption: 2% uplift of ecotourism benefits on a 1km2 ‘catchment’ and estimated rural tourism in the English countryside (130,410 km2) from Countryside Agency (1998)	Value transfer	USD/ha/yr	18608		2007	[43]
BS	W_SUPPLY	[73]	YES	2009	UK	Bristol Avon flows through towns; high bank and erosive edge impacted by cattle poaching; creation of a buffer zone fencing off 330 metres of the field edge whithin a farm; visually attractive through split timber	4	Protection of water quality: 0.2% cost saving on treatment costs of water abstracted, both for irrigation and to serve public treated supply, between the field and the town (assumed as £200,000). Risk of DOUBLE COUNTING	Cost-based	USD/ha/yr	3467		2007	[44]
Wet	NUISANCE	[74]	YES	2008	Belgium	Animal waste treatment facility in Denderleeuw (750m south), on the bank of river Dender; neighboring town Teralfene (Affligem) and Liedekerke; collection and processing of carcasses and animal by-products	5	Reduction in house price from external cost caused by odor from an animal waste processing facility depending on odor perception distance.	Hedonic Pricing	COST €/house/year	3024	26465	2008
BS	NUISANCE	[74]	YES	2008	Belgium	Animal waste treatment facility in Denderleeuw (750m south), on the bank of river Dender; neighboring town Teralfene (Affligem) and Liedekerke; collection and processing of carcasses and animal by-products	5	Reduction in house price from external cost caused by odor from an animal waste processing facility depending on odor perception distance.	Hedonic Pricing	COST €/house/year	3024	26465	2008
Wet	BIODIVERSITY	[75]	X	1990	Sweden	Inland wetalnd; Peat wetland; Martebo mire, Gotland County, Sweden; Low density	4	ES. Sustaining genetic diversity and preserving endangered species	Cost-based	USD/ha/yr	10		2007	[43]
Wet	W_SUPPLY	[75]	X	1990	Sweden	Inland wetalnd; Peat wetland; Martebo mire, Gotland County, Sweden; Low density	4	ES. Maintaining the level and quality of the drinking water	Cost-based	USD/ha/yr	39		2007	[43]
Wet	RECREATION	[76]	YES	2015	Italy, Cave di Noale	Free water surface (FWS) constructed wetlands. More details for each case study from online sources.	5	Yearly flow of recreational benefits: travel cost estimate from Alfranca et al (2011) adjusted and multiplied for the number of visits per year.	Value transfer	€/ha/yr	373		2013
Wet	RECREATION	[76]	YES	2105	Italy, Ca di Mezzo	Free water surface (FWS) constructed wetlands. More details for each case study from online sources.	5	Yearly flow of recreational benefits: travel cost estimate from Alfranca et al (2011) adjusted and multiplied for the number of visits per year.	Value transfer	€/ha/yr	191		2013
Wet	W_QUALITY	[77]	YES	1994	Austria	na	4	value of the Danube floodplains as sinks of pollutants (nutrients nitrogen and phosphorous) calculated as the alternative costs (agricultural sector and sewage treatment plants ) without floodplains as a mitigation measure.	Cost-based	USD/ha/yr	256		2000	[43]
Wet	BIODIVERSITY	[78]	X	1993	UK	Inland wetalnd; Swamps / marshes; Scotland; High density	4	ES. TEEB Maintenance of genetic diversity: Genetic diversity is the variety of genes between and within species populations. Genetic diversity distinguishes different breeds or races from each other thus providing the basis for locally well-adapted cultivars and a gene pool for further developing commercial crops and livestock. Some habitats have an exceptionally high number of species which make…	Value transfer	USD/ha/yr	34		2007	[43]
Wet	RECREATION	[78]	YES	1993	Austria	Inland wetland; Floodplain; Donau river (Danube); Low density	3	The recreational value was estimated as the total costs for transport with and without the inclusion of all other expenditures incurred by the visitors, such as food, hotels, etc.	Value transfer	USD/ha/yr	133		1993	[43]
Wet	W_SUPPLY	[79]	YES	2013	Poland	Biebrza River; seasonal flooding (in riparian wetlands meadows) and constantly high groundwater levels (in groundwater fed fens) remain the most important processes that sustain the biodiversity; European stopover sites for migratory birds; Biebrza National Park established in 1993	3	Total calculated floodplain water storage was multiplied by the unit cost of water storage (EUR/m3/year) assessed on the basis of economic evaluation of artificial reservoirs.	Cost-based	€/ha/yr	3116	9512	2013
Wet	EDUCATION	[80]	YES	2017	US, NY	Hudson River Park in Manhattan metropolitan area; estuarine sanctuary; environmental education mission	2	The average travel cost (TC of environmental education): by first calculating an average cost per student per trip (The average number of students per visit was calculated using on-site data provided by the Park. The distances and travel times for all educational organizations traveling to the park were calculated using estimates from Google Maps (calculate surplus estimates based upon the more c…	Travel cost	USD/student/trip	3	6	2017
BS	EDUCATION	[80]	YES	2017	US, NY	Hudson River Park in Manhattan metropolitan area; estuarine sanctuary; environmental education mission	2	The average travel cost (TC of environmental education): by first calculating an average cost per student per trip (The average number of students per visit was calculated using on-site data provided by the Park. The distances and travel times for all educational organizations traveling to the park were calculated using estimates from Google Maps (calculate surplus estimates based upon the more c…	Travel cost	USD/student/trip	3	6	2017
Wet	W_QUALITY	[81]	YES	2017	US	Farm ponds in Fairfax County, northern Virginia; high density pop; About 1,384 km (860 mi) of the county streams were delineated as perennial and 1,558 km (968 mi) of the streams and shorelines were designated as resource protection area (RPA) with an established 30.5 m (100 ft) buffer around these features including tidal and nontidal wetlands and major floodplains.	2	Net environmental benefit from pollutant load reduction (measured in terms of phosphorous load reduction capability)	Cost-based	USD/ha/yr	580000		2017
Wet	W_QUALITY	[82]	YES	2008	US	Mississippi Alluvial Valley (MAV), floodplain below the confluence of the Mississippi and Ohio Rivers, states of Arkansas, Mississippi, and Louisiana; 2.8 Mha bottomland hardwood forest; agriculture has had profound ecological consequences, such as wildlife habitat loss and fragmentation, loss of flood storage, and water quality degradation due to nonpoint source runoff.	2	Total nitrate mitigated (two principal ways in which wetlands restoration mitigates environmental damage from nitrogen releases: (1) forgone nitrogen (N) losses associated with runoff from crop cultivation and (2) removal of nitrate (NO3) via denitrification) x marginal price estimate for nitrogen mitigation	Direct market pricing	USD/ha/yr	1248		2008
Wet	CARBON_SEQ	[82]	YES	2008	US	Mississippi Alluvial Valley (MAV), floodplain below the confluence of the Mississippi and Ohio Rivers, states of Arkansas, Mississippi, and Louisiana; 2.8 Mha bottomland hardwood forest; agriculture has had profound ecological consequences, such as wildlife habitat loss and fragmentation, loss of flood storage, and water quality degradation due to nonpoint source runoff.	2	The social welfare value of GHG mitigation captures the value of the damages avoided by mitigating the risks of climate change. This is typically estimated with the use of integrated assessment general equilibrium models to capture the social cost of carbon, or SCC.The stream of total GHG flux per hectare is multiplied by the market and social value prices and then discounted back to the present …	Direct market pricing	USD/ha/yr	171	222	2008
Wet	NUISANCE	[82]	YES	2008	US	Mississippi Alluvial Valley (MAV), floodplain below the confluence of the Mississippi and Ohio Rivers, states of Arkansas, Mississippi, and Louisiana; 2.8 Mha bottomland hardwood forest; agriculture has had profound ecological consequences, such as wildlife habitat loss and fragmentation, loss of flood storage, and water quality degradation due to nonpoint source runoff.	2	Value of an hectare for crop production forgone and the sums of the direct and maximum countercyclical payments per base hectare (annual government payment subsidy not obtained); their sum represents the estimated annual per-hectare income forgone by a private landowner who opts to enroll acreage in the Wetland Reserve Program.	Direct market pricing	COST USD/ha/yr	400		2008
Wet	RECREATION	[82]	YES	2008	US	Mississippi Alluvial Valley (MAV), floodplain below the confluence of the Mississippi and Ohio Rivers, states of Arkansas, Mississippi, and Louisiana; 2.8 Mha bottomland hardwood forest; agriculture has had profound ecological consequences, such as wildlife habitat loss and fragmentation, loss of flood storage, and water quality degradation due to nonpoint source runoff.	2	Waterfowl hunter days were assumed to grow as habitat expands: change in number of hunting days x per day consumer surplus value taken from a meta-analytical study on outdoor recreation values conducted for the U.S. Forest Service (Rosenberger and Loomis, 2001).	Value transfer	USD/ha/yr	16		2008
Wet	W_QUALITY	[83]	YES	2008	Denmark	Odense River; water quality is highly affected by human activities; cultivated agricultural land and noncultivated lands i.e. wetlands, meadows and bogs	4	WTP for proposed improvements in the environmental status of the water body (in terms of conditions for fish and plants, the recommended use of the river for fishing as well as for bathing, boating and bird watching.)	Value transfer	DKK/respondent/yr	192	586	2008
Wet	RECREATION	[84]	YES	1993	Austria	Donau-Auen national park; 11500 ha of riparian wetlands and floodplain forests; east of Vienna along the River Danube; habitat for many endangered and also endemic species;	3	WTP for the development of the project	Value transfer	ATS/ha/yr	5565		1993	[43]
Wet	RECREATION	[84]	YES	1993	Austria	Donau-Auen national park; 11500 ha of riparian wetlands and floodplain forests; east of Vienna along the River Danube; habitat for many endangered and also endemic species;	3	WTP for recreational benefits of visiting the national park were estimated as entrance fee	Value transfer	ATS/respondednt/visit	80		1993
BS	W_QUALITY	[85]	YES	1987	US	Cornbelt wetlands, both palustrine (prairie potholes) and riparian (riverine); owners of rural floodplain devote land to agriculture: phosphorus (P) and nitrogen (N) as fertilizer cause eutrophication; Reestablishing riparian forest corridors would create wetland buffers; Fourteen towns (figure 2) from Iowa and Illinois were sampled.	4	Willingness to pay for river quality improvement (significantly affected by agricultural nonpoint pollutants)	Contingent Valuation	USD/respondent/yr	36	49	1987
BS	RECREATION	[85]	YES	1987	US	Cornbelt wetlands, both palustrine (prairie potholes) and riparian (riverine); owners of rural floodplain devote land to agriculture: phosphorus (P) and nitrogen (N) as fertilizer cause eutrophication; Reestablishing riparian forest corridors would create wetland buffers; Fourteen towns (figure 2) from Iowa and Illinois were sampled.	4	WTP for direct household recreational improvement and improved intrinsic values that Cornbelt residents place upon local streams, rivers, and reservoirs	Contingent Valuation	USD/respondent/yr	43	54	1987
Wet	FLOOD	[86]	YES	1996	US	Western Washington; 1) In Lynnwood, Scriber Creek, bisects the city and flow into the city of Brier; 6.8 square miles; subject to flooding; 2) East Side Green River Watershed of Renton; Fifty-four inventoried wetlands comprise approximately 292 acres; provide flood flow attenuation and reduce stormwater runoff; highly fragmented.	4	Estimates of the increase flood storage and reduce peak flood flows that could be achieved associated with the costs of different alternatives: engineered hydrologic enhancements to wetlands currently providing flood protection are used to establish proxies for the value of the flood protection the wetlands currently provide. Flood reduction effect of existing wetlands is expressed in terms of wa…	Cost-based	USD/ha/yr	8484		2007	[43]
Wet	BIODIVERSITY	[87]	YES	2001	Germany	River Elbe; Biodiversity preservation on riparian wetlands, flood plains	5	WTP to implement a bundle of management actions to improve the conservation of endangered species and habitats along the Elbe (Biosphere Reserve "Elbe riverscape" by UNESCO in December 1997)	Contingent Valuation	€/repondent/yr	12		2001
Wet	W_QUALITY	[87]	YES	2001	Germany	River Elbe; Biodiversity preservation on riparian wetlands, flood plains	5	A statistical model from Behrendt and Opitz (2000) is used to quantify the nitrogen retention within the flooded area resulting from the decreased running velocity. Two substitutes for the service ‘improvement of water quality’ are considered: (a) the marginal costs of waste water treatment in sewage treatment plants: mean 7.7 € / kg N (ranges from 5-8 € / kg N, see GRÜNEBAUM 1993) (b) the margin…	Cost-based	€/ha/yr	2089	6188	2001
Wet	RECREATION	[88]	YES	1997	Greece	Artificial Lake Kerkini, in the province of Sindiki; Wetlands of International Importance; Important Bird Area; rich and diverse vegetation; supports a substantial cultivated area by providing water for irrigation; providing commercial fishing, biodiversity, educational information and training, and recreational facilities, and as acting as a basis for scientific research.	3	WTP for the protection of the lake (split into WTP: to secure the existence of the lake (existence value), to secure the existence of wildlife (wildlife value), to retain the option for them to enjoy the lake in the future (option value), to ensure that future generations would be able to enjoy the lake (bequest value), to ensure the use of the lake for themselves (use value) or to ensure that ot…	Contingent Valuation	USD/ha/yr	9144		2003	[28]
Wet	FLOOD	[89]	X	1998	UK	Inland wetalnd; Swamps / marshes; River Ancholme, UK; High density; 800 ha	4	ES Flood protection and areas for flood storage in river floodplains	Cost-based	USD/ha/yr	8331		2003	[28]
Wet	W_SUPPLY	[89]	X	1998	UK	Inland wetalnd; Swamps / marshes; River Ancholme, UK; High density	4	ES. TEEB Fresh water (River discharge - volume of water flowing through a river channel): Ecosystems play a vital role in the global hydrological cycle, as they regulate the flow and purification of water. Vegetation and forests influence the quantity of water available locally.	Cost-based	USD/ha/yr	9369		2007	[43]
Wet	FLOOD	[89]	X	1999	UK	River Nar; 150 ha	4	ES Flood protection and areas for flood storage in river floodplains	Cost-based	USD/ha/yr	150		2003	[28]
Wet	FLOOD	[90]	YES	2005	Greece	Zazari–Cheimaditida catchment, 11,400 ha; Included among Less Favoured Areas of Greece; Agrochemical use is moderate; water extraction for irrigation is heavy; plant species and local fauna, especially endangered bird species; meadows have been reduced, open water surface has diminished, reed bed is constantly expanding and water quality has been reduced.	2	WTP for improvement for floodwater retention function: the short/longterm detention and storage of waters from overbank flooding and/or slope runoff and their gradual release, so as to reduce peak flow.	Contingent Valuation	€/respondent/yr	44		2005
Wet	W_SUPPLY	[90]	YES	2005	Greece	Zazari–Cheimaditida catchment, 11,400 ha; Included among Less Favoured Areas of Greece; Agrochemical use is moderate; water extraction for irrigation is heavy; plant species and local fauna, especially endangered bird species; meadows have been reduced, open water surface has diminished, reed bed is constantly expanding and water quality has been reduced.	2	WTP for improvement in recharge of groundwater by infiltration and percolation of detained floodwater into a significant aquifer. Groundwater is endowed with existence, option and bequest values, while its actual uses include provision of household water, irrigation, livestock and wildlife watering and treatment of wastewater through surface water supplies.	Contingent Valuation	€/respondent/yr	43		2005
Wet	W_QUALITY	[90]	YES	2005	Greece	Zazari–Cheimaditida catchment, 11,400 ha; Included among Less Favoured Areas of Greece; Agrochemical use is moderate; water extraction for irrigation is heavy; plant species and local fauna, especially endangered bird species; meadows have been reduced, open water surface has diminished, reed bed is constantly expanding and water quality has been reduced.	2	WTP (annual increment in municipal taxes) for improvements in Nutrient export function (nitrogen and phosphorus) from a wetland via biological, biochemical, physical and land management processes.	Contingent Valuation	€/respondent/yr	42		2005
BS	FLOOD	[91]	YES	1998	US	Elkhorn Slough is salt marsh wetlands in California. Approximately 10,300 acres of the 44,900 acres (18170,385 ha) in the watershed (26%) are in agricultural production; plants and animals, with a high percentage rare or threatened; California’s first National Estuarine Research Reserve in 1980; high nutrient concentrations from agricultural runoff, and erosion on the steep, sandy upland slopes; …	1	Value associated with benefit from BS as temporary flood storage areas, reducing flood damage. Assuming they reduce 5% of potential flood damage, and considering only FEMA values (Federally funded disaster relief for flooding)	Cost-based	USD/ha/yr	14		1998
BS	NUISANCE	[91]	YES	1998	US	Elkhorn Slough is salt marsh wetlands in California. Approximately 10,300 acres of the 44,900 acres (18170,385 ha) in the watershed (26%) are in agricultural production; plants and animals, with a high percentage rare or threatened; California’s first National Estuarine Research Reserve in 1980; high nutrient concentrations from agricultural runoff, and erosion on the steep, sandy upland slopes; …	1	Forgone agricultural benefit (forgone strowberry profit) due to implementation of vegetative buffer strips which reduces available land for agricultural production, generally on low productive land.	Cost-based	COST USD/ha/yr	485		1998
BS	RECREATION	[91]	YES	1998	US	Elkhorn Slough is salt marsh wetlands in California. Approximately 10,300 acres of the 44,900 acres (18170,385 ha) in the watershed (26%) are in agricultural production; plants and animals, with a high percentage rare or threatened; California’s first National Estuarine Research Reserve in 1980; high nutrient concentrations from agricultural runoff, and erosion on the steep, sandy upland slopes; …	1	Recreational value of the watershed: 50% of estimation of per day spending for recreational activities (kayaking, boating, nature tours, birding, fishing, hiking, and biking) x total visitors. Assuming BS reduce 50% of the degrading inputs allowing ecotourism	Cost-based	USD/ha/yr	55	66	1998
BS	W_QUALITY	[91]	YES	1998	US	Elkhorn Slough is salt marsh wetlands in California. Approximately 10,300 acres of the 44,900 acres (18170,385 ha) in the watershed (26%) are in agricultural production; plants and animals, with a high percentage rare or threatened; California’s first National Estuarine Research Reserve in 1980; high nutrient concentrations from agricultural runoff, and erosion on the steep, sandy upland slopes; …	1	Net benefit from reduced nitrate concentrations (-50%) in shallow groundwater estimated through average annual drinking water costs for the residents	Cost-based	USD/ha/yr	77		1998
Wet	RECREATION	[92]	X	2002	France	Lake Der-Chantecoq; 4800 ha	4	ES. Recreational activities	Contingent Valuation	USD/ha/yr	687		2003	[28]
Wet	AESTETHICS	[93]	X	1980	US	Inland wetalnd; Swamps / marshes; Charles River Basin, Massachusetts, USA; Low density	3	ES. TEEB. Aesthetic appreciation and inspiration for culture, art and design: Language, knowledge and the natural environment have been intimately related throughout human history. Biodiversity, ecosystems and natural landscapes have been the source of inspiration for much of our art, culture and increasingly for science.	Hedonic Pricing	USD/ha/yr	781		1980	[43]
Wet	FLOOD	[93]	X	1980	US	Inland wetalnd; Swamps / marshes; Charles River Basin, Massachusetts, USA; Low density	3	ES. TEEB Moderation of extreme events (flood protection): Extreme weather events or natural hazards include floods, storms, tsunamis, avalanches and landslides. Ecosystems and living organisms create buffers against natural disasters, thereby preventing possible damage. For example, wetlands can soak up flood water whilst trees can stabilize slopes. Coral reefs and mangroves help protect coastlin…	Cost-based	USD/ha/yr	82459		1980	[43]
Wet	RECREATION	[93]	X	1980	US	Inland wetalnd; Swamps / marshes; Charles River Basin, Massachusetts, USA; Low density	3	ES. TEEB Recreational service: Walking and playing sports in green space is not only a good form of physical exercise but also lets people relax. The role that green space plays in maintaining mental and physical health is increasingly being recognized, despite difficulties of measurement.	Value transfer	USD/ha/yr	50200		1980	[43]
Wet	W_QUALITY	[93]	X	1980	US	Inland wetalnd; Swamps / marshes; Charles River Basin, Massachusetts, USA; Low density	3	ES. TEEB Waste-water treatment (Sinks of nutrients and contaminants) : Ecosystems such as wetlands filter both human and animal waste and act as a natural buffer to the surrounding environment. Through the biological activity of microorganisms in the soil, most waste is broken down. Thereby pathogens (disease causing microbes) are eliminated, and the level of nutrients and pollution is reduced.	Cost-based	USD/ha/yr	41909		1980	[43]
Wet	W_SUPPLY	[93]	X	1980	US	Inland wetland; Swamps / marshes; Charles River Basin, Massachusetts, USA; Low density	3	ES. TEEB Fresh water: Ecosystems play a vital role in the global hydrological cycle, as they regulate the flow and purification of water. Vegetation and forests influence the quantity of water available locally.	Cost-based	USD/ha/yr	146		2007	[44]
BS	W_QUALITY	[40]	YES	2018	Denmark	Riparian buffer strips in five regions of Denmark; 2m wide RBS for all natural streams	5	WTP for improving the water quality of all waterbodies in their region to good ecological status. (GOOD STATUS: the water is a switable habitat for insects and plants, and for most species of fish including trout and salmom; the water is well swited for fishing and swimming)	Choice Experiment	DKK/household/yr	1899	2099	2018
BS	RECREATION	[40]	YES	2018	Denmark	Riparian buffer strips in five regions of Denmark; 2m wide RBS for all natural streams	5	WTP for establishing walking paths: possibility of walking in the RBS could be improved by establishing 1m wide walking paths	Choice Experiment	DKK/household/yr	140	281	2018
Wet	FLOOD	[94]	YES	2014	US	Otter Creek flows through a large wetland complex, connected floodplain from Rutland, VT, to the town of Middlebury; watershed forested (60%), 24% is agricultural, and 8% is wetland; Wetlands are forested swamplands; damage to downstream communities	3	First, we modeled hypothetical flood peaks. Next,we estimated flood extent for wetlands and no-wetlands scenarios. Third,we identified flooded structures in each scenario. Fourth,we calculated expected damages for each structure as a function of flooding depth and house value. Finally, we calculated the difference in total damage between wetlands and no-wetlands scenarios.	Cost-based	USD/ha/yr	496	3861	2014

## Sheet: Table S3 - (1) CPI
	AUT	BEL	CAN	DEU	DNK	ESP	FRA	GBR	ITA	SWE	USA	GRC	CHE	POL	OECD (2020), Inflation (CPI) (indicator). doi: 10.1787/eee82e6e-en (Accessed on 16 March 2020)
1980	42.0337	39.2214	34.7906	48.6729	34.7673	19.9965	36.6713	30.3451	20.6802	31.912	34.769	5.19471	55.2389	0	https://data.oecd.org/price/inflation-cpi.htm#indicator-chart
1981	44.8933	42.213	39.1296	51.7608	38.8585	22.9059	41.5538	33.9491	24.3963	35.7746	38.3622	6.46773	58.8241	0
1982	47.3337	45.8967	43.3434	54.4736	42.7913	26.2077	46.5314	36.8683	28.4169	38.8474	40.7144	7.82538	62.1506	0
1983	48.9142	49.4132	45.8849	56.2677	45.7475	29.3983	50.933	38.5677	32.579	42.2943	42.0223	9.4045	63.984	0
1984	51.6843	52.5469	47.8601	57.6213	48.6253	32.7145	54.8415	40.4809	36.0958	45.6966	43.8295	11.1403	65.8596	0
1985	53.3328	55.1052	49.7564	58.8119	50.9004	35.5981	58.0394	42.9387	39.4187	49.0656	45.3835	13.292	68.1222	0
1986	54.2424	55.8185	51.8436	58.7358	52.7726	38.7289	59.5127	44.4105	41.7143	51.144	46.2449	16.3512	68.6333	0
1987	55.0028	56.6856	54.1019	58.8826	54.8941	40.7614	61.4701	46.253	43.6946	53.2862	47.9396	19.0323	69.6218	0
1988	56.0565	57.3436	56.2813	59.6328	57.3836	42.7332	63.1302	48.2	45.9048	56.39	49.8944	21.6071	70.9255	0
1989	57.4963	59.1253	59.0861	61.291	60.1223	45.6354	65.3387	51	48.7783	60.0234	52.3029	24.5577	73.1634	0.967064
1990	59.3717	61.1642	61.9107	62.9437	61.7105	48.7029	67.4258	55.1	51.9278	66.2458	55.1261	29.5757	77.1171	6.45881
1991	61.3532	63.1308	65.3937	65.491	63.1886	51.593	69.5925	59.2	55.1733	72.5024	57.4607	35.3299	81.6359	11.4172
1992	63.8201	64.6636	66.3682	68.8029	64.5131	54.6497	71.2375	61.9	58.0812	74.2239	59.2011	40.9392	84.9315	16.6804
1993	66.1379	66.4447	67.606	71.8815	65.3245	57.1466	72.7367	63.5	60.7685	77.7333	60.9485	46.8391	87.728	22.8462
1994	68.0912	68.0244	67.7179	73.8173	66.6258	59.843	73.9408	64.9	63.2307	79.4109	62.5377	51.9324	88.4755	30.3834
1995	69.6188	69.023	69.173	75.0768	68.014	62.64	75.2692	66.6	66.5411	81.3606	64.2922	56.5723	90.0679	38.876
1996	70.9144	70.4566	70.2594	76.1652	69.4602	64.8692	76.7617	68.5	69.2074	81.7943	66.1767	61.2082	90.799	46.5714
1997	71.8405	71.6038	71.3985	77.6423	70.9759	66.1479	77.6858	70	70.6214	82.3329	67.7237	64.5967	91.2713	53.5167
1998	72.5032	72.2835	72.1096	78.3498	72.2859	67.3612	78.1917	71.3	72.0021	82.1129	68.775	67.6755	91.2877	59.7235
1999	72.9157	73.0937	73.3606	78.8085	74.0915	68.9175	78.6117	72.6	73.1998	82.4925	70.2798	69.4598	92.0239	63.9962
2000	74.6255	74.9535	75.3555	79.9435	76.2425	71.2838	79.9292	73.4	75.0574	83.2342	72.653	71.6486	93.4581	70.3319
2001	76.6031	76.8043	77.2584	81.5295	78.025	73.8428	81.2358	74.6	77.1479	85.2368	74.7063	74.0661	94.3824	74.1357
2002	77.9899	78.0679	79.0032	82.6879	79.9167	76.1065	82.7983	75.7	79.0498	87.0766	75.8912	76.7542	94.989	75.5482
2003	79.0471	79.3084	81.1825	83.543	81.575	78.4193	84.5358	76.7	81.1625	88.7534	77.614	79.4641	95.5953	76.064
2004	80.6764	80.9717	82.6903	84.9347	82.5167	80.8027	86.3467	77.8	82.9535	89.085	79.6919	81.7676	96.3628	78.6369
2005	82.5312	83.2239	84.5207	86.2485	84.0167	83.5248	87.8542	79.4	84.6004	89.4887	82.3956	84.6664	97.4922	80.3542
2006	83.721	84.7146	86.2128	87.609	85.6333	86.4612	89.3258	81.4	86.3692	90.706	85.0537	87.3722	98.5251	81.3865
2007	85.5365	86.259	88.0564	89.6226	87.0833	88.8707	90.655	83.3	87.9496	92.7125	87.48	89.9017	99.2467	83.3876
2008	88.2873	90.1316	90.1435	91.9782	90.0583	92.4925	93.205	86.2	90.894	95.8991	90.8384	93.6351	101.654	86.8607
2009	88.7343	90.0837	90.4135	92.2659	91.2333	92.2262	93.2867	87.9	91.5982	95.4249	90.5155	94.7682	101.166	90.1574
2010	90.3435	92.0559	92.02	93.2843	93.3417	93.8862	94.715	90.1	92.9955	96.5299	91.9999	99.2346	101.862	92.4841
2011	93.3128	95.3073	94.6998	95.2201	95.9167	96.8869	96.715	93.6	95.5814	99.3883	94.9042	102.539	102.098	96.4048
2012	95.6322	98.0138	96.1351	97.1326	98.2167	99.2569	98.605	96	98.4884	100.271	96.8681	104.079	101.391	99.8372
2013	97.545	99.1047	97.0371	98.5942	98.9917	100.655	99.4567	98.2	99.6899	100.227	98.2871	103.12	101.171	100.828
2014	99.1114	99.4417	98.8873	99.4882	99.55	100.503	99.9617	99.6	99.9302	100.047	99.8815	101.767	101.157	100.882
2015	100	100	100	100	100	100	99.9992	100	99.969	100	100	100	100	100
2016	100.892	101.974	101.429	100.492	100.25	99.7974	100.183	101	99.875	100.984	101.262	99.1743	99.5654	99.3352
2017	102.991	104.142	103.049	102.009	101.4	101.749	101.217	103.6	101.1	102.796	103.419	100.286	100.097	101.397
2018	105.05	106.28	105.386	103.776	102.225	103.454	103.09	106	102.25	104.805	105.945	100.914	101.034	103.236
2019	106.658	107.807	107.44	105.276	103	104.177	104.233	107.8	102.875	106.674	107.865	101.169	101.401	105.535
2020	108.132	108.606	108.21	105.809	103.433	103.841	104.729	108.9	102.733	107.205	109.195	99.9065	100.665	109.097
2021	111.123	111.256	111.884	109.135	105.35	107.053	106.449	111.6	104.658	109.524	114.325	101.129	101.25	114.611

## Sheet: Table S3 - (2) Exchange rates
	AUT	BEL	CAN	CHE	DEU	DNK	ESP	FRA	GBR	ITA	SWE	USA	GRC	POL	Exchange rates (indicator). doi: 10.1787/037ed317-en (Accessed on 16 March 2020)
1980	0.940241	0.724882	1.16923	1.67571	0.929358	5.63594	0.430937	0.644185	0.430295	0.442318	4.22957	1	0.125067	0.004422	https://doi:10.1787/037ed317-en
1981	1.15745	0.92041	1.1989	1.96424	1.15552	7.12337	0.554865	0.828501	0.497641	0.58709	5.06344	1	0.162607	0.005115
1982	1.23974	1.13264	1.23374	2.03028	1.2407	8.33244	0.660267	1.00191	0.572447	0.698513	6.28261	1	0.196047	0.008482
1983	1.30545	1.26752	1.23241	2.09914	1.30546	9.14499	0.862031	1.16186	0.659725	0.78442	7.66711	1	0.258442	0.009155
1984	1.45412	1.43243	1.29507	2.34968	1.45511	10.3566	0.966193	1.33227	0.751807	0.907395	8.2718	1	0.33079	0.011324
1985	1.50357	1.47194	1.36551	2.45713	1.50523	10.5964	1.02199	1.36979	0.779246	0.986143	8.60393	1	0.405338	0.014714
1986	1.10951	1.10739	1.38947	1.79892	1.11026	8.09099	0.841708	1.05588	0.682197	0.769939	7.12358	1	0.410803	0.017529
1987	0.918766	0.925488	1.32598	1.49119	0.918992	6.84032	0.74212	0.916327	0.611927	0.669364	6.34044	1	0.397445	0.026508
1988	0.89734	0.911463	1.2307	1.4633	0.897944	6.73153	0.7001	0.90813	0.56217	0.672235	6.12715	1	0.416318	0.043055
1989	0.96151	0.9768	1.18397	1.63593	0.96125	7.31018	0.711464	0.972646	0.611173	0.708627	6.44688	1	0.476644	0.143918
1990	0.826278	0.828409	1.16677	1.38916	0.826111	6.18856	0.612635	0.830127	0.563177	0.618768	5.91879	1	0.465191	0.95
1991	0.848522	0.846513	1.14573	1.43399	0.84851	6.39646	0.624521	0.860135	0.567015	0.640723	6.04747	1	0.534898	1.05761
1992	0.798626	0.796965	1.20872	1.40622	0.798459	6.03613	0.615311	0.807037	0.569774	0.636484	5.82383	1	0.559426	1.36264
1993	0.845344	0.857625	1.29009	1.47762	0.84533	6.48394	0.764851	0.863354	0.666757	0.812731	7.78343	1	0.67278	1.8115
1994	0.830056	0.829365	1.36567	1.36769	0.829721	6.36055	0.805104	0.846404	0.653427	0.832758	7.71597	1	0.711967	2.27228
1995	0.732651	0.730791	1.37244	1.18247	0.732749	5.60237	0.749396	0.760947	0.633668	0.841274	7.13327	1	0.679861	2.42498
1996	0.769355	0.767516	1.36352	1.23601	0.769379	5.79867	0.761251	0.779856	0.640958	0.796866	6.70596	1	0.706417	2.6961
1997	0.886917	0.886812	1.3846	1.45131	0.886609	6.60446	0.879964	0.889798	0.610836	0.879576	7.63489	1	0.801344	3.27929
1998	0.899622	0.89982	1.48351	1.44981	0.899704	6.70083	0.897884	0.899375	0.603824	0.896676	7.94987	1	0.86729	3.4754
1999	0.938283	0.938283	1.48571	1.50215	0.938283	6.97624	0.938283	0.938283	0.618057	0.938283	8.26243	1	0.896982	3.96711
2000	1.08271	1.08271	1.48539	1.68884	1.08271	8.08314	1.08271	1.08271	0.660931	1.08271	9.16224	1	1.07234	4.34607
2001	1.11653	1.11653	1.54884	1.68762	1.11653	8.32282	1.11653	1.11653	0.694655	1.11653	10.3291	1	1.11653	4.0939
2002	1.05756	1.05756	1.57034	1.55861	1.05756	7.89471	1.05756	1.05756	0.667223	1.05756	9.73712	1	1.05756	4.08003
2003	0.884048	0.884048	1.40101	1.34665	0.884048	6.58767	0.884048	0.884048	0.612472	0.884048	8.0863	1	0.884048	3.88908
2004	0.803922	0.803922	1.30128	1.2435	0.803922	5.99106	0.803922	0.803922	0.54618	0.803922	7.34889	1	0.803922	3.65764
2005	0.8038	0.8038	1.21141	1.24518	0.8038	5.99691	0.8038	0.8038	0.549998	0.8038	7.47309	1	0.8038	3.23548
2006	0.796433	0.796433	1.13434	1.25384	0.796433	5.94678	0.796433	0.796433	0.543487	0.796433	7.37825	1	0.796433	3.10316
2007	0.729672	0.729672	1.07405	1.20037	0.729672	5.4437	0.729672	0.729672	0.499772	0.729672	6.75877	1	0.729672	2.76795
2008	0.679923	0.679923	1.06709	1.08309	0.679923	5.09813	0.679923	0.679923	0.543966	0.679923	6.5911	1	0.679923	2.40924
2009	0.716958	0.716958	1.14153	1.08814	0.716958	5.36087	0.716958	0.716958	0.641919	0.716958	7.65382	1	0.716958	3.12014
2010	0.754309	0.754309	1.03011	1.04291	0.754309	5.62408	0.754309	0.754309	0.647179	0.754309	7.20752	1	0.754309	3.0153
2011	0.718414	0.718414	0.989258	0.888042	0.718414	5.36871	0.718414	0.718414	0.624141	0.718414	6.49354	1	0.718414	2.96285
2012	0.778338	0.778338	0.999365	0.937684	0.778338	5.79248	0.778338	0.778338	0.633047	0.778338	6.77502	1	0.778338	3.25654
2013	0.752945	0.752945	1.03014	0.926904	0.752945	5.61631	0.752945	0.752945	0.639661	0.752945	6.51397	1	0.752945	3.16062
2014	0.752728	0.752728	1.10475	0.916151	0.752728	5.61247	0.752728	0.752728	0.60773	0.752728	6.86078	1	0.752728	3.15454
2015	0.901296	0.901296	1.27879	0.962381	0.901296	6.72791	0.901296	0.901296	0.654545	0.901296	8.43484	1	0.901296	3.7695
2016	0.903421	0.903421	1.32561	0.985394	0.903421	6.73172	0.903421	0.903421	0.740634	0.903421	8.56199	1	0.903421	3.94278
2017	0.885206	0.885206	1.29794	0.984692	0.885206	6.60289	0.885206	0.885206	0.776977	0.885206	8.54886	1	0.885206	3.77933
2018	0.846773	0.846773	1.29582	0.977892	0.846773	6.31462	0.846773	0.846773	0.749532	0.846773	8.69252	1	0.846773	3.61172
2019	0.893276	0.893276	1.32679	0.993709	0.893276	6.66945	0.893276	0.893276	0.783445	0.893276	9.45835	1	0.893276	3.83937
2020	0.875506	0.875506	1.34115	0.938965	0.875506	6.54215	0.875506	0.875506	0.78	0.875506	9.21031	1	0.875506	3.89974
2021	0.845494	0.845494	1.25388	0.913846	0.845494	6.28711	0.845494	0.845494	0.727065	0.845494	8.57657	1	0.845494	3.86192

## Sheet: Table S3  - (3) Correction
		Study site (ss)							Value adjusted (ss)			Confidence Level:
NBS (Wetland/Buffer strips)	Benefit	Reference	Country	Year of value calculation	Year of lastest available update of the value	Latest available value - SINGLE or RANGE		Units	Value 2021 in Italy expressed in € - SINGLE or RANGE		Units	1) policy-site-fit: 1-5	2)Monetary valuation technique: 0-1 - Cost-based and direct market pricing if €/ha/yr, CV or CE if €/person/yr =1 - VT=0		3)Biophysical Indicator: 0-1 -low reliability/SE not perfectly in line with JRC =0 -reliable/SE equal to JRC =1		Confidence level	Correction factor (7=100%; 6=90%; 5=80%; 4=70%; 3/2/1=50%)	Value 2021 in Italy expressed in € after confidence level applied - SINGLE or RANGE
Wetland	WATER SUPPLY	[63]	Spain	2007	2004	3815		USD/ha/yr	8880.87	0	€/ha/yr	5	Value transfer	0	ES. Water supply: Filtering, retention & storage of fresh water (e.g. aquifers) -> Provision of water for consumptive use (e.g. drinking, irrigation, industrial)	1	6	0.9	7992.78	0
Wetland	WATER SUPPLY	[79]	Poland	2013	2013	3116	9512	€/ha/yr	2095.39	6396.47	€/ha/yr	3	Cost-based	1	Total calculated floodplain water storage was multiplied by the unit cost of water storage (EUR/m3/year) assessed on the basis of economic evaluation of artificial reservoirs.	1	5	0.8	1676.32	5117.17
Wetland	NATURAL HABITAT and BIODIVERSITY SUPPORT	[63]	Spain	2007	2004	279		USD/ha/yr	649.479	0	€/ha/yr	5	Value transfer	0	ES. Suitable living space for wild species -> Maintenance of biological & genetic diversity; thus the basis of most other functions (e.g. community structure of sea grass meadows) AND Suitable reproduction/grow habitat -> Maintenance of wild/commercially harvested species (e.g. sea grass meadows, coraligen & littoral rock for fish juveniles)	1	6	0.9	584.531	0
Wetland	WATER QUALITY	[87]	Germany	2001	2001	2089	6188	€/ha/yr	4055.38	12012.8	€/ha/yr	5	Cost-based	1	A statistical model is used to quantify the nitrogen retention within the flooded area resulting from the decreased running velocity. Two substitutes for the service ‘improvement of water quality’ are considered: (a) the marginal costs of waste water treatment in sewage treatment plants: mean 7.7 € / kg N (ranges from 5-8 € / kg N) (b) the marginal costs of avoidance of nitrogen loads by agricult…	1	7	1	4055.38	12012.8
Wetland	WATER QUALITY	[63]	Spain	2007	2004	2071		USD/ha/yr	4821.04	0	€/ha/yr	5	Value transfer	0	ES. Role of vegetation & biota in removal of xenic compounds -> Pollution control, detoxification, decomposition, filtering of particles by bacteria and other organisms; removal of nutrients such as nitrogen and phosphorous; beneficial trophic dynamics; abatement of noise pollution	0	5	0.8	3856.84	0
Wetland	CARBON SEQUESTRATION	[82]	US	2008	2008	171	222	USD/ha/yr	203.541	264.246	€/ha/yr	2	Direct market pricing	1	The social welfare value of GHG mitigation captures the value of the damages avoided by mitigating the risks of climate change. This is typically estimated with the use of integrated assessment general equilibrium models to capture the social cost of carbon, or SCC.The stream of total GHG flux per hectare is multiplied by the market and social value prices and then discounted back to the present …	1	4	0.7	142.479	184.973
Wetland	FLOOD RISK	[72]	Denmark	2000	2000	1000		DKK/ha/yr	274	0	€/ha/yr	4	Cost-based	1	Reduction in house price from external cost caused by odor from an animal waste processing facility depending on odor perception distance.	0	5	0.9	246.6	0
Wetland	NUISANCE (ODOURS, RUMORS, OBSTACLES TO COMMON FARMING PRACTICES)	[74]	Belgium	2008	2008	3024	26465	COST €/house/yr	6656.92	58259	€/house/yr	5	Hedonic Pricing	1	Reduction in house price from external cost caused by odor from an animal waste processing facility depending on odor perception distance.	0	6	0.9	5991.23	52433.1
Wetland	RECREATION and TOURISM	[72]	Spain	2007	2004	3474		USD/ha/yr	8087.06	0	€/ha/yr	4	Value transfer	0	Recreational value: adjusted value transfer of willingness to pay for access	0	4	0.7	5660.94	0
Wetland	RECREATION and TOURISM	[63]	Denmark	2000	2000	40		DKK/visitor/year	11	0	€/person/visit	5	Value transfer	0	ES. Attractive land/seascape features -> Enjoyment of scenery (e.g. scenic roads, housing, coastal/seascape) AND Land/seascapes with recreational uses -> Travel to natural ecosystems for eco-tourism, rural-tourism & nature study/enjoy; coast related cultural & sports events	1	6	0.9	9.9	0
Wetland	RECREATION and TOURISM	[59]	Spain	2007	2007	3		€/person/visit	7	0	€/person/visit	3	Travel Cost	1	Travel costs calculated as: Opportunity costs, which are based on the fact that a person who devotes time for leisure activities is paying for it, because he/she will not receive any wages during this time. Salaries are usually accepted as a proxy variable that reflects the opportunity costs of taking part in this recreational activity and therefore have been used in this study. (minimum interpro…	0	4	0.7	4.9	0
Wetland	VISUAL IMPACT/AMENITY and AESTHETIC	[63]	Spain	2007	2004	2199		USD/ha/yr	5119.01	0	€/ha/yr	5	Value transfer	0	ES. Natural features with cultural & artistic value -> Use of nature as motive in books, films, painting, folklore, architecture, marketing AND Natural features with spiritual & historic value -> Use of nature for religious or historic purposes (e.g. heritage value of natural ecosystems & features, small fisherman ermitas)	0	5	0.8	4095.21	0
Wetland	AWARENESS/EDUCATION	[62]	Greece	2005	2003	9	13	€/respondent/one-off payment	24.9052	35.9741	€/person/once	2	Travel cost	1	Environmental education: estimate of tc visit to a national forest interpretive facility	1	4	0.7	17.4336	25.1819
Buffer strips	WATER SUPPLY	[63]	Spain	2007	2004	4747		USD/ha/yr	11050.5	0	€/ha/yr	4	Choice Experiment	1	Marginal WTP for an improvement in wetland management attribute: educational, research and cultural information that may be derived from the existence of the wetland, including visits by scientists, students, and school children to learn about ecology and nature	1	6	0.9	9945.41	0
Buffer strips	NATURAL HABITAT and BIODIVERSITY SUPPORT	[73]	UK	2009	2007	14		USD/ha/yr	24	0	€/ha/yr	5	Value transfer	0	ES. Water supply: Filtering, retention & storage of fresh water (e.g. aquifers) -> Provision of water for consumptive use (e.g. drinking, irrigation, industrial)	1	6	0.9	21.6	0
Buffer strips	WATER QUALITY	[91]	US	1998	1998	77		USD/ha/yr	179	0	€/ha/yr	1	Cost-based	1	Net benefit from reduced nitrate concentrations (-50%) in shallow groundwater estimated through average annual drinking water costs for the residents	0	2	0.5	89.5	0
Buffer strips	CARBON SEQUESTRATION	[73]	UK	2009	2007	2216		USD/ha/yr	3820.6	0	€/ha/yr	4	Value transfer	0	Climate regulation (local temperature/precipitation, GHG sequestration, etc.): transition from values in the literature for permanent grassland towards those derived for wetted, carbon accreting soils or to wet woodland, using a marginal cost of carbon of £27 per tonne	0	4	0.7	2674.42	0
Buffer strips	FLOOD RISK	[63]	Spain	2007	2004	217		USD/ha/yr	505	0	€/ha/yr	5	Value transfer	0	ES. Influence of ecosystem structure on dampening environmental disturbances -> Storm protection (e.g. natural beaches, dunes, small bays or calas); flood protection (e.g. wetlands, forest, rieras)	0	5	0.8	404	0
Buffer strips	NUISANCE (ODOURS, RUMORS, OBSTACLES TO COMMON FARMING PRACTICES)	[74]	Belgium	2008	2008	3024	26465	COST €/house/year	6656.92	58259	€/house/yr	5	Hedonic Pricing	1	Reduction in house price from external cost caused by odor from an animal waste processing facility depending on odor perception distance.	0	6	0.9	5991.23	52433.1
Buffer strips	RECREATION and TOURISM	[63]	Spain	2007	2004	3385		USD/ha/yr	7879.88	0	€/ha/yr	5	Value transfer	0	ES. Attractive land/seascape features -> Enjoyment of scenery (e.g. scenic roads, housing, coastal/seascape) AND Land/seascapes with recreational uses -> Travel to natural ecosystems for eco-tourism, rural-tourism & nature study/enjoy; coast related cultural & sports events	1	6	0.9	7091.89	0
Buffer strips	VISUAL IMPACT/AMENITY and AESTHETIC	[73]	UK	2009	2007	1803		USD/ha/yr	3108.54	0	€/ha/yr	4	Value transfer	0	Local amenity and informal enjoyment: attractive river walk alternative of the upper Bristol Avon in its poached state (Assuming that 1 person per week might otherwise drive 10 miles -40p per mile- for an alternative)	0	4	0.7	2175.98	0
Buffer strips	AWARENESS/EDUCATION	[80]	USA	2017	2017	6	17	USD/person/visit	2.54263	5.08526	€/person/visit	2	Travel cost	1	Environmental education: estimate of tc visit to a national forest interpretive facility	1	4	0.7	1.77984	3.55968

## Sheet: Table S3 - (4) GDP
	AUT	BEL	CAN	FRA	GRC	ITA	POL	ESP	CHE	SWE	GBR	USA	DNK	DEU
1980	..	..	9586.24	..	..	..	..	..	..	..	..	..	..	..
1981	..	..	10860.8	..	..	..	..	..	..	..	..	..	..	..		Data from database: World Development Indicators
1982	..	..	11164.3	..	..	..	..	..	..	..	..	..	..	..		Last Updated: 02/27/2020
1983	..	..	11903.3	..	..	..	..	..	..	..	..	..	..	..		https://data.worldbank.org/indicator/NY.GDP.PCAP.PP.CD
1984	..	..	13061.6	..	..	..	..	..	..	..	..	..	..	..
1985	..	..	14112.9	..	..	..	..	..	..	..	..	..	..	..
1986	..	..	14705.9	..	..	..	..	..	..	..	..	..	..	..
1987	..	..	15683.4	..	..	..	..	..	..	..	..	..	..	..
1988	..	..	16952.5	..	..	..	..	..	..	..	..	..	..	..
1989	..	..	18025.5	..	..	..	..	..	..	..	..	..	..	..
1990	19462	18678	18730.8	17642.1	13304.5	18627.6	6181.89	13678.3	28470.4	20414.1	17084.6	23888.6	18233.9	19452.6
1991	20605.9	19590.7	18960.4	18328	14011.6	19540.3	5921.54	14464	28801.4	20720.9	17413.6	24342.3	19063.7	20984.2
1992	21281.2	20261.5	19567	18951	14321.4	20138.7	6189.79	14858.1	29122	20825.1	17833.6	25419	19814.1	21709.5
1993	21720.5	20462.1	20563.8	19194.9	14341.7	20427.7	6556.68	14975.6	29504.8	20757.4	18666	26387.3	20218.5	21862.8
1994	22630	21507.1	21947	19992.6	14866.3	21308.4	7036.27	15585.5	30275.2	21877.8	19747.5	27694.9	21678.1	22784.6
1995	23684.6	22434.7	23010.8	20766.7	15424.5	22382.9	7681.2	16279.1	30851.8	23094.1	20617.4	28690.9	22684.3	23552.3
1996	24553.8	22738.4	23811.6	21352.9	16145.4	23052.6	8275.8	16975.1	31534.1	23927.5	21968.9	29967.7	23734.8	24071.9
1997	25426.7	23732.3	25258.9	22243.7	17155.9	23875.8	8936.63	17912.8	32771.1	24805.8	23049.6	31459.1	24928.4	24572.7
1998	26675	24368.9	26319.7	23359.4	18033.8	25021.1	9487.75	19096.6	33905.1	25887.8	23683.5	32853.7	25814.1	25345.1
1999	27606.5	25440.8	27841.4	24307.5	18464.7	25602.4	10040.9	19954.3	34818.1	27471.6	24463.5	34515.4	26653.8	26291.2
2000	29376	27784.6	29362.1	26090.6	19516.2	27072.4	10672.1	21584.3	36772.7	29618.3	26472.2	36330	28658.1	27199
2001	29702.8	28788.1	30230.8	27490.1	20954.8	28033.7	11119.7	22949.2	37896.7	29927.6	27807.2	37133.6	29437.3	28368.5
2002	31178.7	30282.3	30963.1	28523.9	22615.9	28736.6	11804.3	24371.6	38814.4	30926.5	29062.1	37997.8	30640.3	29178.6
2003	32144.2	30932.9	32349.9	28172.7	23896.6	29196.9	12288.5	25046.1	38840.9	31814.9	30355.3	39490.3	30820.4	29908.1
2004	33773.8	32063.1	33925.7	29060.5	25460.5	29554.7	13353.7	26143.6	40336.4	33858.6	32058.4	41724.6	32938.7	31333.8
2005	35013.7	33177.9	36327.2	30498.6	25577.5	30130.6	13896.8	27606.9	41749.2	34244.5	32747.4	44123.4	34150.2	31794.1
2006	37662.2	35259.2	38119.4	32468.5	28549.2	32453.6	15152.3	30720.2	46502.9	37730.2	34845.6	46302	37334.4	34160.3
2007	39430.6	36791.2	39575.3	34121.3	29320.3	34141.2	16802.8	32469.5	51208.1	40905.1	35695.3	48050.2	39006.2	36287.5
2008	41316.2	37883.3	40376.3	35095.3	30856	35523.3	18303.4	33263.3	54096.8	42158.3	36863.6	48570	41278.3	37802.4
2009	40918.1	37749.5	38865.4	34678.1	30359.1	34602.9	19239.9	32092.4	53354	40279.5	35212.4	47194.9	40331.4	36815.8
2010	42009.4	39840.1	40099.4	35902.9	27913.1	35158.4	21072.5	31682.7	54858.4	42223.9	36576.6	48650.6	43003.1	38952.7
2011	44452.7	40942.4	41666.7	37440.6	25671.5	36598	22827.7	31868	57987.5	44608.6	37379.3	50066	44403.4	42541.5
2012	46457.3	42290.8	42291	37679.1	24911.1	36486.3	23745.7	31720.1	59933.6	45432.4	38514	51784.4	44804	43359.6
2013	47922	43671.1	44298.6	39523.9	25986.7	36314.7	24567.5	32434	62225.1	46312.4	40218.7	53291.1	46726.9	44993.9
2014	48799.7	44929.7	45753.8	40144	26625.1	36194.9	25475.5	33525.7	64103	47184.7	41580.6	55123.8	47901.4	47011.6
2015	49865.9	46200.9	44670.1	40850	26760.4	36899.4	26862.1	34903.1	66020.2	49103.1	42912.9	56762.7	49045.3	47609.8
2016	52684	48597.4	46472.3	42924.6	27511.8	39927	28322.1	37286.2	68105.2	50430.3	44635.3	57866.7	51976	50579.7
2017	54173	50442.3	48317.2	44577.1	28604.9	41581.1	30064.5	39528.9	69103.6	51948	46372.4	59914.8	55356.7	53071.5
2018	56960.1	52535.2	49992.8	46576.6	29617.5	43036.2	31953	40696.4	71660.2	53521.6	47573.5	62805.3	57483	55235.4
2019	58076.3	54278.4	49299.2	49072.4	30356.3	44376.2	33797.8	41695.1	72033.9	54598.8	49041.5	65094.8	58701	55652.9
2020	55686	53070.2	46572.1	46991.2	27948.6	41987.8	34287	37756.4	71745.3	55064.9	46526.9	63027.7	60229.9	54844.5
2021	58427.5	58930.9	52085	50728.7	31295.1	45936	37502.6	40775.3	77324.1	59324	49675.3	69287.5	64651.2	57927.6

## Sheet: Table S3 - (5) Exchange rate
	https://www.ecb.europa.eu/stats/policy_and_exchange_rates/euro_reference_exchange_rates/html/eurofxref-graph-usd.en.html
			2021-01-01
			AVERAGE USD 1 = EUR 0.8460
			2021-12-31
			AVERAGE EUR 1 = USD 1.1827

## Sheet: Table S4
Category	Benefit	CICES	CICES	Example indicators	Effect
		V 4.3	V 5.1
ENVIRONMENT	WATER SUPPLY	1.1.2.1	4.2.1.1	Increase in surface/ground water quantity (m3/ha/yr): flow, retention, storage of fresh water	↑
		1.2.2.1	4.2.1.2
	NATURAL HABITAT and BIODIVERSITY SUPPORT	2.3.1.2	2.2.2.3	Increase in the number of resident species of plants and animals (including rare and endangered species); improvements in habitat diversity and integrity; maintenance of minimum critical surface area, etc.	↑
	WATER QUALITY	2.3.4.1	2.2.5.1	Removal of nutrients: Nitrogen, Phosphorus, (Pesticides) (kg/ha/yr)	↑
SOCIAL	CARBON SEQUESTRATION	2.3.5.1	2.2.6.1	Quantity of GHG potentially abated: sequestration / storage capacity per hectare (tonsCo2/ha)	↑
	FLOOD RISK	2.2.2.2	2.2.1.3	Increased water storage (buffer) capacity in m3; reduced peak flows; ecosystem structure characteristics; Reduction of flood danger and prevented damage to infrastructure	↑
	NUISANCE (ODOURS, RUMORS, OBSTACLES TO COMMON FARMING PRACTICES)	2.1.2.3	2.1.2.1	Reduction in market good price caused by external cost; real estate value	↓
			2.1.2.2
			2.1.2.3
	RECREATION and TOURISM	3.1.1.1	3.1.1.1	Presence of landscape & wildlife features suitable for recreational activities: entrance fee/visitor per year, WTP/person/year for protection interventions; actual or potential use	↑
		3.1.1.2	3.1.1.2
	VISUAL IMPACT/AMENITY and AESTHETIC	3.1.2.5	3.1.2.4	Presence of landscape features of aesthetic appreciation; number of houses bordering natural areas; real estate values; number of users of scenic routes	↑↓
	AWARENESS/ EDUCATION	3.1.2.2	3.1.2.2	Number of education trips/classes visiting; Presence of features with special educational and scientific value/interest; number of scientific studies, etc.	↑

## Sheet: Table S5
Benefit	Study site (ss)					Value adjusted (ss) - steps 1-2-3 of the methodology		Units
	Reference	Country	Latest update	Latest available value ($) - MIN	Latest available value ($) - MAX	Value 2021 expressed in $ - MIN	Value 2021 expressed in $ - MAX
WATER SUPPLY (Wet)	[63]	Spain	2004	3815		4549		USD/ha/yr
	[79]	Poland	2013	3116	9512	897	2737	€/ha/yr
NATURAL HABITAT and BIODIVERSITY SUPPORT (Wet)	[63]	Spain	2004	279		333		USD/ha/yr
WATER QUALITY (Wet)	[87]	Germany	2001	2089	6188	2504	7419	€/ha/yr
	[63]	Spain	2004	2071		2195		USD/ha/yr
CARBON SEQUESTRATION (Wet)	[82]	US	2008	171	222	151	196	USD/ha/yr
FLOOD RISK (Wet)	[72]	Denmark	2000	1000		154		DKK/ha/yr
NUISANCE (ODOURS, RUMORS, OBSTACLES TO COMMON FARMING PRACTICES) (Wet)	[74]	Belgium	2008	3024	26465	4941	43242	€/house/yr
RECREATION and TOURISM (Wet)	[72]	Denmark	2000	40		5		DKK/visitor/year
	[63]	Spain	2004	3474		4142		USD/ha/yr
	[59]	Spain	2007	3		3		€/person/visit
VISUAL IMPACT/AMENITY and AESTHETIC (Wet)	[63]	Spain	2004	2199		2331		USD/ha/yr
AWARENESS/EDUCATION (Wet)	[62]	Greece	2003	9	13	12	17	€/respondent/one-off payment
WATER SUPPLY (BF)	[63]	Spain	2004	4747		5660		USD/ha/yr
NATURAL HABITAT and BIODIVERSITY SUPPORT (BF)	[73]	UK	2007	14		15		USD/ha/yr
WATER QUALITY (BF)	[91]	US	1998	77		64		USD/ha/yr
CARBON SEQUESTRATION (BF)	[73]	UK	2007	2216		2078		USD/ha/yr
FLOOD RISK (BF)	[63]	Spain	2004	217		230		USD/ha/yr
NUISANCE (ODOURS, RUMORS, OBSTACLES TO COMMON FARMING PRACTICES) (BF)	[74]	Belgium	2008	3024	26465	4941	43242	€/house/year
RECREATION and TOURISM (BF)	[63]	Spain	2004	3385		4036		USD/ha/yr
VISUAL IMPACT/AMENITY and AESTHETIC (Wet)	[73]	UK	2007	1803		1691		USD/ha/yr
AWARENESS/EDUCATION (BF)	[80]	USA	2017	3	6	2	3	USD/student/trip
